# Supplementary material for: Coating of Magnetite Nanoparticles with Fucoidan to Enhance Magnetic Hyperthermia Efficiency
Source: MDPI journal article supplement (doi:10.3390/nano11112939), 2021-11-02
Supplement: s1 [file s1]

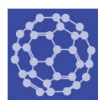

# Coating of Magnetite Nanoparticles with Fucoidan to Enhance Magnetic Hyperthermia Efficiency

Joana Gonçalves <sup>1</sup>, Cláudia Nunes <sup>1,\*</sup>, Liliana Ferreira <sup>2,3</sup>, Maria M. Cruz <sup>3</sup>, Helena Oliveira <sup>4</sup>, Verónica Bastos <sup>4</sup>, Álvaro Mayoral <sup>5,6,7</sup>, Qing Zhang <sup>7</sup>, Paula Ferreira <sup>1,\*</sup>

## Supplementary Materials:

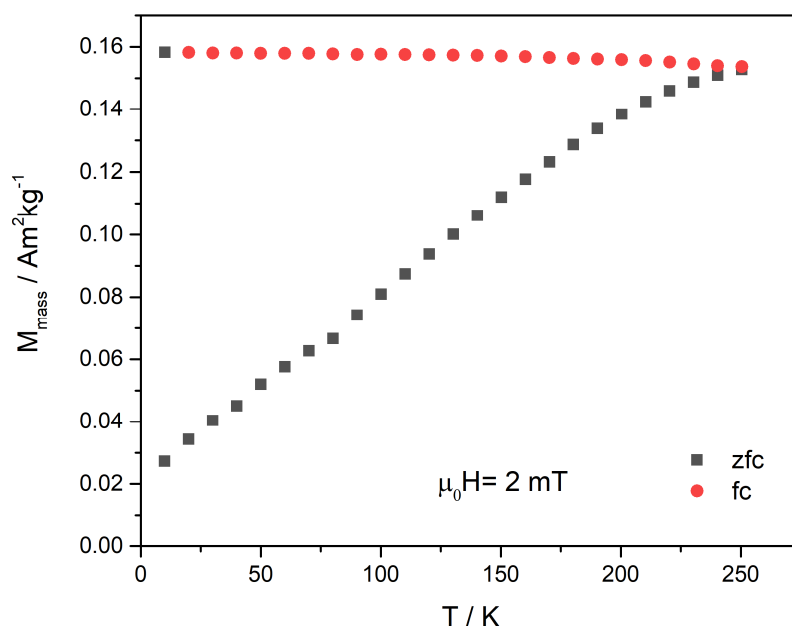

**Figure S1:** Temperature dependence of the magnetization for MF-IS sample measured at 2 mT.

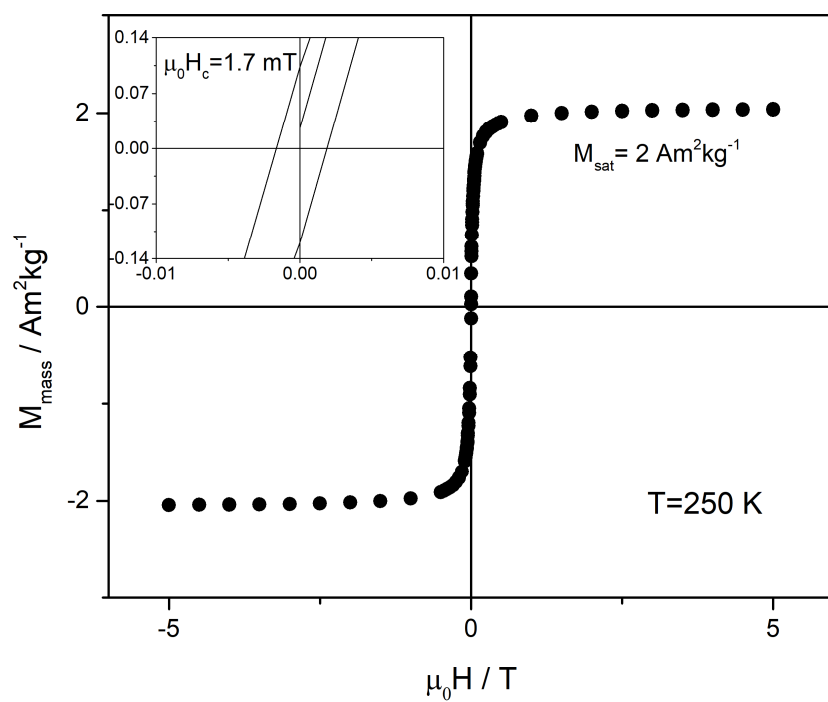

**Figure S2:** Hysteresis curve at 250 K for MF-IS sample. The inset shows the low field region of the hysteresis curves.

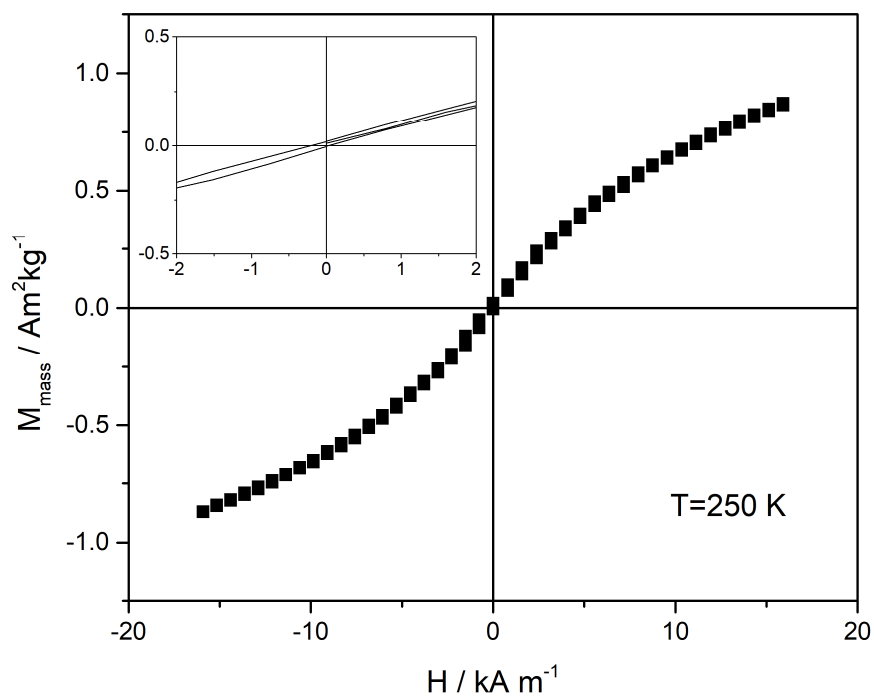

**Figure S3:** Minor hysteresis curves at 250 K for MF-IS sample.
